# Supplementary material
Source: Springer Nature journal article supplement (https://www.springermedizin.de/resource/supplementary/12891_2010_1119_MOESM4_ESM.pdf/9507748)

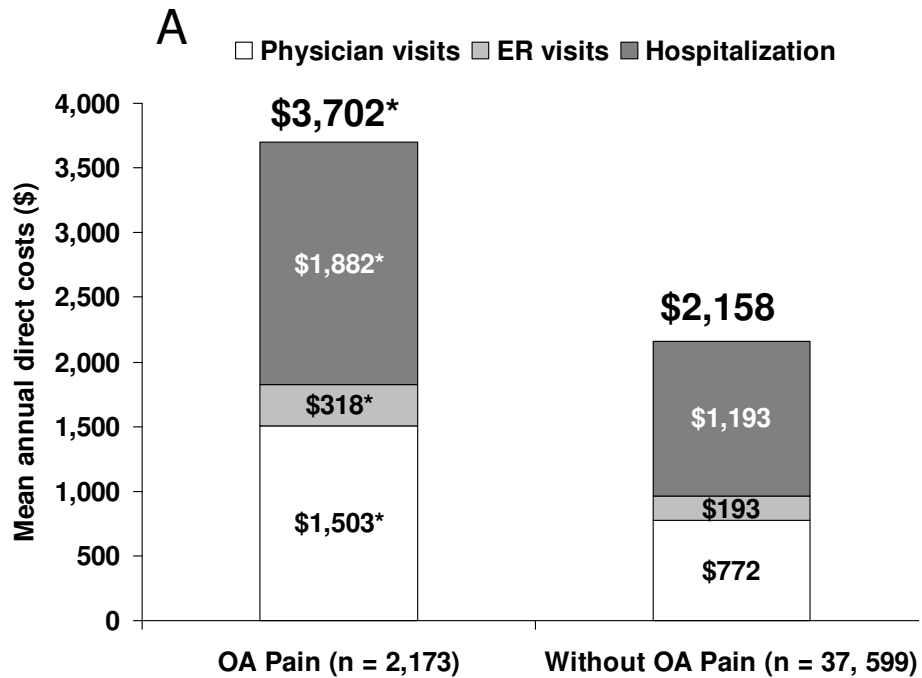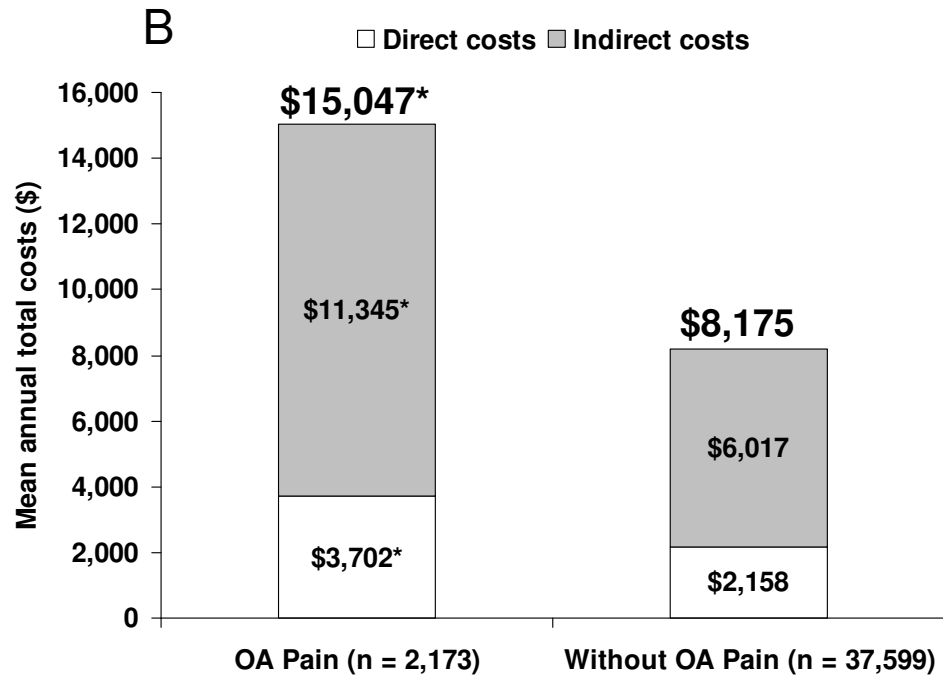

Supplement: MOESM4 [file 9507748]
